# Supplementary material for: Real-time monitoring of ciprofloxacin degradation in an electro-Fenton-like system using electrochemical-mass spectrometry
Source: Royal Society of Chemistry journal article supplement (doi:10.1039/c9ew00868c), 2019-11-13
Supplement: c9ew00868c1.pdf [file c9ew00868c1.pdf]

## Supporting information

# **Real-time monitoring of ciprofloxacin degradation in Electro-Fenton-like system using electrochemical-mass spectrometry**

Jing He,<sup>a</sup> Na Li,<sup>b,c\*</sup> Dongmei Zhang,<sup>b</sup> Guangfan Zheng,<sup>d</sup> Hong Zhang,<sup>b</sup> Kai Yu,<sup>b</sup> Jie Jiang<sup>b,e\*</sup>

<sup>a</sup> School of Chemistry and Chemical Engineering, Harbin Institute of Technology, Harbin, Heilongjiang 150090, P. R. China.

<sup>b</sup> School of Marine Science and Technology, Harbin Institute of Technology at Weihai, Weihai, Shandong 264209, P. R. China.

<sup>c</sup> School of Information and Optoelectronic Science and Engineering, South China Normal University, Guangzhou 510006, P. R. China

<sup>d</sup> Key Laboratory of Applied Surface and Colloid Chemistry of MOE & School of Chemistry and Chemical Engineering, Shaanxi Normal University (SNNU), Xi'an 710062, P. R. China

<sup>e</sup> State Key Laboratory of Urban Water Resource and Environment, Harbin Institute of Technology, Harbin, Heilongjiang 150090, P. R. China

\*Corresponding Author. E-mail: jiejiang@hitwh.edu.cn.

E-mail: dreamerlina@163.com

Figure S1. MS<sup>n</sup> mass spectra of  $m/z$  279, 334, 306, 263 and 291.

Figure S2. MS<sup>2</sup> mass spectra of  $m/z$  330 and 304.

Figure S3. MS<sup>2</sup> mass spectra of  $m/z$  275, 277, 280, 293, 305 and 364.

Figure S4. Signal intensities of  $m/z$  334, 291, 263, 279 and 280 obtained at different reaction times.

Figure S5. Potential mechanism of free radicals attack for CIP degradation in Electro-Fenton-like system.

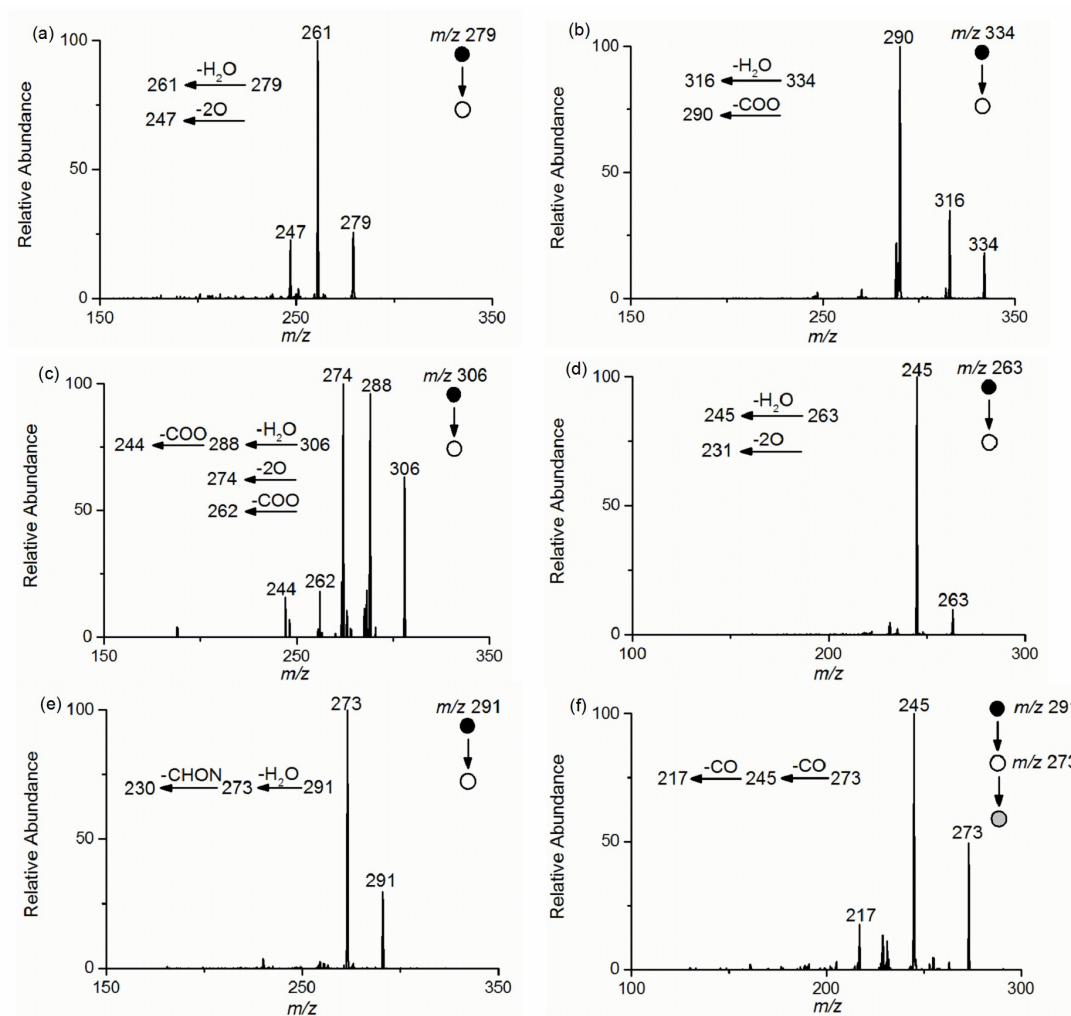

**Figure S1.** MS/MS mass spectra of (a)  $m/z$  279, (b) 334, (c) 306, (d) 263 and (e) 291.

MS<sup>3</sup> mass spectrum of (f)  $m/z$  273.

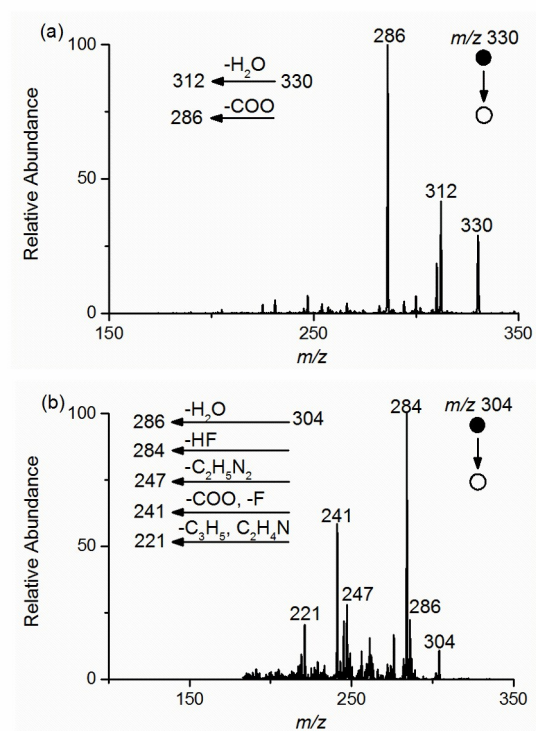

**Figure S2.** MS/MS mass spectra of (a)  $m/z$  330 and (b) 304.

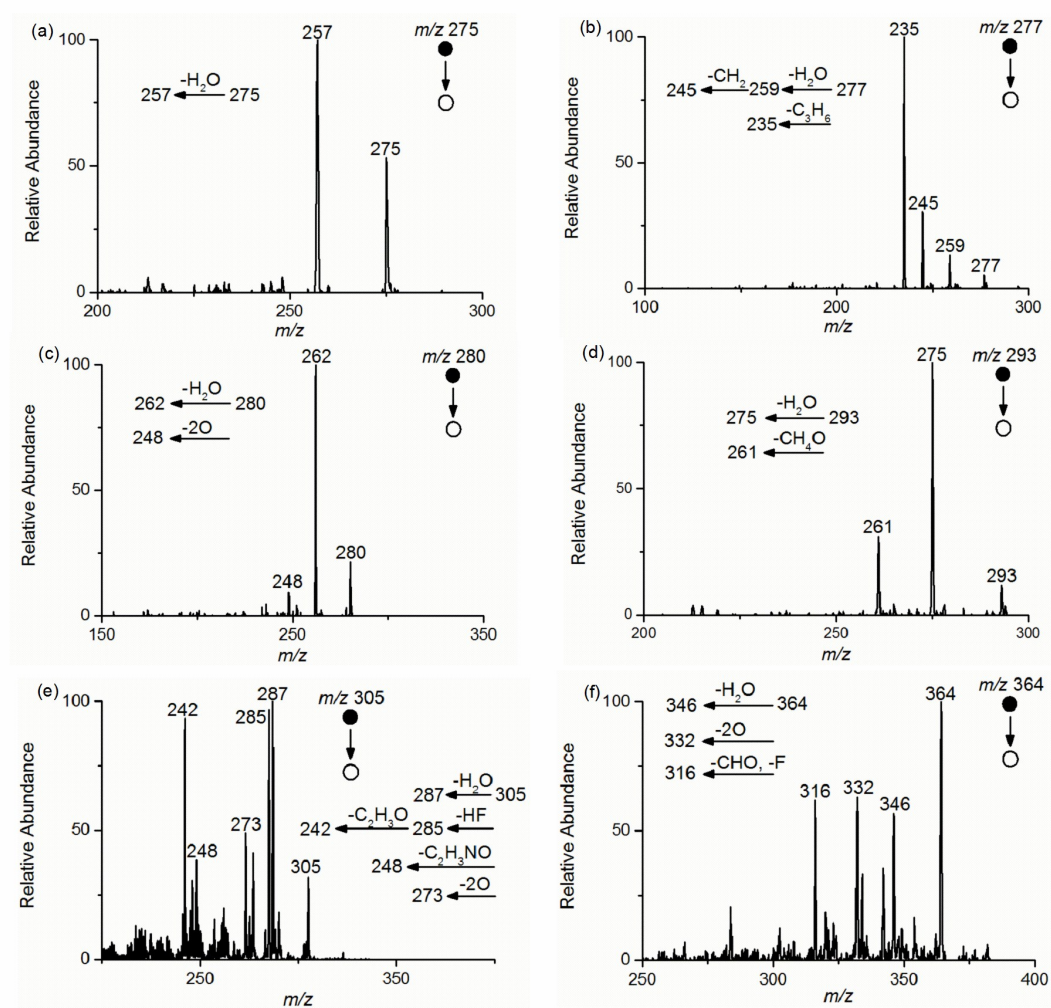

**Figure S3.** MS/MS mass spectra of (a)  $m/z$  275, (b) 277, (c) 280, (d) 293, (e) 305 and (f) 364.

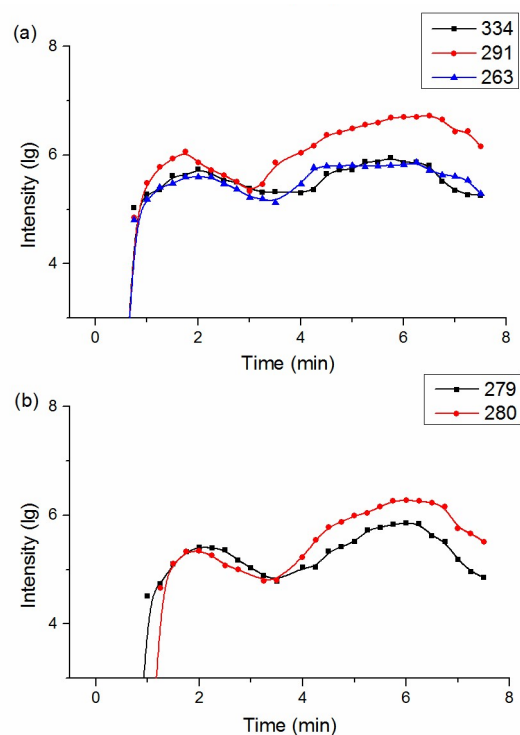

**Figure S4.** Signal intensities of (a)  $m/z$  334, 291, 263; and (b)  $m/z$  279, 280 obtained at different reaction times. The concentrations of CIP,  $\text{Fe}^{2+}$  and  $\text{S}_2\text{O}_8^{2-}$  were  $5 \times 10^{-5}$  mol/L,  $3 \times 10^{-3}$  mol/L and  $3 \times 10^{-3}$  mol/L, respectively. The total volume of reaction solution was 100  $\mu\text{L}$ , and the proportion of methanol/water was 9:1. The  $\Delta V$  was 20 V.

[illegible]

**Figure S5.** Potential mechanism of free radicals attack for CIP degradation in Electro-Fenton-like system.
